# Supplementary material for: Assistive technology usage, unmet needs and barriers to access: a sub-population-based study in India
Source: PubMed Central journal article supplement — Lancet Reg Health Southeast Asia. 2023 May 19;15:100213. doi: 10.1016/j.lansea.2023.100213 (PMC10442958; doi:10.1016/j.lansea.2023.100213), 2023-05-19
Supplement: mmc1.pdf [file mmc1.pdf]

## Supplementary

**Table 1: Association of Assistive Technology usage with characteristics of the study sample (sex, age groups, place)**

| Characteristics   | n (%)       | AT use (%)  | OR (95%CI)       |
|-------------------|-------------|-------------|------------------|
| <b>Sex</b>        |             |             |                  |
| Male              | 4087 (48.2) | 875 (21.4)  | 1                |
| Female            | 4397 (51.1) | 1012 (23.1) | 1.07 (0.95-1.20) |
| <b>Age groups</b> |             |             |                  |
| <17 years         | 2001 (23.6) | 97 (4.8)    | 1                |
| 18 to 39 years    | 3130 (36.9) | 278 (8.9)   | 1.9(1.5-2.4)     |
| 40 to 59 years    | 2144(25.3)  | 836 (38.9)  | 12.5(10.0-15.6)  |
| 60 to 79 years    | 1082(12.8)  | 594 (54.9)  | 24.1(19.0-30.6)  |
| >80 years         | 129(1.5)    | 83 (64.3)   | 36.3(24.0-55.0)  |
| <b>Places</b>     |             |             |                  |
| Urban             | 4151(48.9)  | 949 (22.9)  | 1                |
| Rural             | 4335(51.1)  | 939 (21.7)  | 0.83(0.74-0.93)  |

AT: Assistive Technology
